# Supplementary material
Source: publisher site journal article supplement (https://subtbiol.pensoft.net/article/64279/download/suppl/31/)
Supplement: Supplementary file 1

**Supplementary Table 1.** Environmental covariates were measured or estimated at each sampling unit to model detection probability of cavefishes and cave crayfishes. Sampling units (SU) are referenced by the site number, then the sequential number of units within the site (e.g., 1.2 refers to the second sampling unit within site 1). Sampling units 3.1–3.5 and 7.1 were also sampled on 01 April 2017. Using eDNA surveys only, sampling unit 10.1 was sampled a fourth time on 15 May 2017 and a fifth time on 17 May 2017. Due to high water, sampling unit 18.1 was surveyed only with eDNA on 24 April and 19 May 2017. Values for continuous environmental variables (turbidity = turb, velocity = Vel, and volume = Vol) are reported as the average across survey dates ± standard deviation; however, values were not averaged for the analysis. Values for the categorical variables light and substrate (Sub) are reported as ambient light visible (Yes) or not (No) and fine or coarse substrate, respectively. Sampling unit 10.1 did not have ambient light on the first survey, but did on later surveys due to cave flooding. The species of cavefish (*Troglichthys rosae* = ros, *Typhlichthys eigenmanni* = eig) or cave crayfish (*Cambarus aculabrum* = acu, *C. setosus* = set, *C. subterraneus* = sub, *C. tartarus* = tar, *Orconectes stygocaneyi* = sty, unknown = unk) known or thought to occur at each sampling unit are also reported.

| SU | Type | County | State | Survey 1 | Survey 2 | Survey 3 | Turb (NTU) | Vel (m/s) | Vol (m3) | Light | Sub | Fish | Crayfish |
| --- | --- | --- | --- | --- | --- | --- | --- | --- | --- | --- | --- | --- | --- |
| 1.1 | Cave | Lawrence | MO | 25 Feb | 09 Mar | 18 Mar | 0.77 ± 0.63 | 0 | 4.2 ± 0 | Yes | Fine | ros | set |
| 1.2 | Cave | Lawrence | MO | 25 Feb | 09 Mar | 18 Mar | 1.01 ± 0.74 | 0 | 11.6 ± 0 | Yes | Fine | ros | set |
| 2.1 | Cave | Lawrence | MO | 25 Feb | 09 Mar | 18 Mar | 1.30 ± 0.07 | 0 | 16.9 ± 0 | Yes | Coarse | ros | set |
| 3.1 | Cave | Christian | MO | 27 Feb | 09 Mar | 18 Mar | 1.03 ± 0.92 | 0.06 ± 0.06 | 104.3 ± 36.8 | Yes | Coarse | ros | set |
| 3.2 | Cave | Christian | MO | 27 Feb | 09 Mar | 18 Mar | 1.09 ± 1.29 | 0.10 ± 0.12 | 12.4 ± 4.9 | Yes | Coarse | ros | set |
| 3.3 | Cave | Christian | MO | 27 Feb | 09 Mar | 18 Mar | 1.18 ± 1.10 | 0.05 ± 0.06 | 18.4 ± 0 | Yes | Fine | ros | set |
| 3.4 | Cave | Christian | MO | 27 Feb | 09 Mar | NA | 1.19 ± 1.03 | 0.08 ± 0.10 | 17.3 ± 14.1 | No | Coarse | ros | set |
| 3.5 | Cave | Christian | MO | 27 Feb | 09 Mar | 18 Mar | 1.24 ± 0.91 | 0.02 ± 0.02 | 26.2 ± 9.2 | No | Coarse | ros | set |
| 4.1 | Cave | Delaware | OK | 21 Feb | 10 Mar | 21 Mar | 0.55 ± 0.07 | 0.02 ± 0.01 | 358.0 ± 0 | Yes | Coarse | ros | tar |
| 4.2 | Cave | Delaware | OK | 21 Feb | 10 Mar | 21 Mar | 0.60 ± 0.02 | 0.02 ± 0.02 | 504.8 ± 0 | No | Coarse | ros | tar |
| 4.3 | Cave | Delaware | OK | 21 Feb | 10 Mar | 21 Mar | 0.66 ± 0.00 | 0.02 ± 0 | 96.5 ± 0 | No | Coarse | ros | tar |
| 4.4 | Cave | Delaware | OK | NA | 10 Mar | 21 Mar | 0.68 ± 0.06 | 0.02 ± 0.01 | 143.6 ± 0 | No | Coarse | ros | tar |
| 5.1 | Cave | Benton | AR | 22 Feb | 01 Mar | 07 Mar | 0.41 ± 0.20 | 0.01 ± 0 | 1.3 ± 0 | Yes | Coarse | ros | acu |
| 5.2 | Cave | Benton | AR | 22 Feb | 01 Mar | 07 Mar | 0.79 ± 0.88 | 0.15 ± 0 | 17.3 ± 0 | No | Coarse | ros | acu |
| 5.3 | Cave | Benton | AR | 22 Feb | 01 Mar | 07 Mar | 1.05 ± 0.57 | 0.12 ± 0 | 47.5 ± 0 | Yes | Coarse | ros | acu |
| 6.1 | Cave | Benton | AR | 22 Feb | 01 Mar | 07 Mar | 1.55 ± 0.86 | 0 | 73.8 ± 0 | No | Fine | ros | acu |
| 6.2 | Cave | Benton | AR | 22 Feb | 01 Mar | 07 Mar | 2.33 ± .033 | < 0.01 ± 0.01 | 1.5 ± 0 | No | Fine | ros | acu |
| 7.1 | Cave | Christian | MO | 27 Feb | 09 Mar | 18 Mar | 0.85 ± 0.42 | 0.01 ± 0.01 | 5.6 ± 0 | Yes | Fine | ros | set |
| 8.1 | Cave | Christian | MO | 27 Feb | 09 Mar | 18 Mar | 0.37 ± 0.04 | 0.03 ± 0 | 19.2 ± 0 | Yes | Coarse | ros | set |
| 9.1 | Cave | Taney | MO | 28 Feb | 12 Apr | 17 May | 1.29 ± 0.85 | 0.06 ± 0.05 | 114.1 ± 6.9 | No | Coarse | ros | unk |
| 9.2 | Cave | Taney | MO | 28 Feb | 12 Apr | 17 May | 1.15 ± 0.40 | 0.24 ± 0.12 | 7.2 ± 1.1 | No | Fine | ros | unk |
| 9.3 | Cave | Taney | MO | 28 Feb | 12 Apr | 17 May | 1.31 ± 0.72 | 0.07 ± 0.06 | 53.2 ± 9.3 | No | Fine | ros | unk |
| 10.1 | Cave | Ozark | MO | 01 Mar | 12 Apr | 25 Apr | 15.57 ± 3.61 | 0 | 368.7 ± 327.2 | Both | Fine | ros | sty |
| 11.1 | Cave | McDonald | MO | 08 Mar | 17 Mar | 31 Mar | 1.08 ± 0.65 | 0 | 1.5 ± 0 | No | Fine | ros | set |
| 11.2 | Cave | McDonald | MO | 08 Mar | 17 Mar | 31 Mar | 1.64 ± 1.11 | 0 | 37.5 ± 0 | No | Fine | ros | set |
| 12.1 | Cave | McDonald | MO | 17 Mar | 31 Mar | 06 Apr | 3.05 ± 1.13 | 0 | 0.6 ± 0 | No | Fine | ros | set |
| 13.1 | Cave | Ottawa | MO | 17 Mar | 29 Mar | 05 Apr | 3.68 ± 3.05 | 0.04 ± 0.02 | 1.0 ± 0.2 | Yes | Coarse | ros | unk |
| 14.1 | Cave | Ottawa | OK | 19 Mar | 29 Mar | 05 Apr | 1.9 ± 0.94 | 0.11 ± 0.08 | 4.1 ± 2.0 | No | Coarse | ros | unk |
| 14.2 | Cave | Ottawa | OK | 19 Mar | 29 Mar | 05 Apr | 2.97 ± 2.44 | 0.15 ± 0.14 | 4.8 ± 1.9 | No | Coarse | ros | unk |
| 14.3 | Cave | Ottawa | OK | 19 Mar | 29 Mar | 05 Apr | 3.56 ± 2.58 | 0.10 ± 0.07 | 11.1 ± 2.5 | No | Fine | ros | unk |
| 15.1 | Cave | Camden | MO | 25 Mar | 15 Apr | 13 May | 2.11 ± 1.90 | 0 | 3.9 ± 1.5 | No | Fine | eig | unk |
| 15.2 | Cave | Camden | MO | 25 Mar | 15 Apr | 13 May | 3.65 ± 4.21 | 0.01 ± 0 | 163.5 ± 52.4 | No | Coarse | eig | unk |
| 15.3 | Cave | Camden | MO | 25 Mar | 15 Apr | 13 May | 4.43 ± 3.57 | 0 | 98.7 ± 32.6 | No | Coarse | eig | unk |
| 16.1 | Cave | Camden | MO | 25 Mar | 15 Apr | 13 May | 4.77 ± 2.68 | 0.27 ± 0.23 | 21.1 ± 5.7 | No | Fine | eig | unk |
| 16.2 | Cave | Camden | MO | 25 Mar | 15 Apr | 13 May | 3.82 ± 0.18 | 0.23 ± 0.16 | 16.4 ± 6.3 | No | Coarse | eig | unk |
| 16.3 | Cave | Camden | MO | 25 Mar | 15 Apr | 13 May | 4.41 ± 4.00 | 0.06 ± 0.04 | 1.8 ± 0.9 | No | Coarse | eig | unk |
| 17.1 | Cave | Delaware | OK | 30 Mar | 05 Apr | 24 Apr | 3.54 ± 2.47 | 0 | 33.3 ± 15.3 | No | Coarse | ros | sub |
| 17.2 | Cave | Delaware | OK | 30 Mar | 05 Apr | 24 Apr | 3.79 ± 3.54 | 0 | 4.3 ± 6.0 | No | Coarse | ros | sub |
| 18.1 | Cave | Delaware | OK | 04 Apr | 24 Apr | 19 May | 0.54 ± 0 | 0 | 693.3 ± 184.8 | Yes | Coarse | ros | tar |
| 19.1 | Cave | Delaware | OK | 04 Apr | 24 Apr | 19 May | 3.95 ± 4.37 | 0 | 54.4 ± 25.7 | Yes | Coarse | ros | tar |
| 20.1 | Cave | Ozark | MO | 25 Apr | 15 May | 17 May | 17.52 ± 3.79 | 0 | 163.3 ± 80.9 | Yes | Fine | ros | sty |
| 21.1 | Cave | Ozark | MO | 25 Apr | NA | NA | 41.5 | 0 | 3.1 | No | Fine | ros | sty |
| 22.1 | Spring | Ozark | MO | 01 Mar | 12 Apr | 25 Apr | 2.05 ± 0.00 | 0.05 ± 0.05 | 0.1 ± < 0.0 | Yes | Coarse | ros | sty |
| 23.1 | Spring | Newton | MO | 08 Mar | 16 Mar | 31 Mar | 1.61 ± 1.39 | 0 | 150.7 ± 16.3 | No | Fine | ros | set |
| 24.1 | Spring | Newton | MO | 16 Mar | 31 Mar | 06 Apr | 2.55 ± 1.21 | 0.08 ± 0.04 | 37.2 ± 24.6 | Yes | Fine | ros | set |
| 25.1 | Spring | Newton | MO | 16 Mar | 31 Mar | 06 Apr | 3.59 ± 2.43 | 0.02 ± 0.03 | 3.4 ± 1.9 | Yes | Fine | ros | set |
| 26.1 | Spring | Newton | MO | 16 Mar | 31 Mar | 06 Apr | 1.62 ± 1.14 | 0.13 ± 0.03 | 12.0 ± 3.5 | Yes | Fine | ros | set |
| 27.1 | Spring | Newton | MO | 16 Mar | 31 Mar | 06 Apr | 3.38 ± 1.53 | 0.13 ± 0.04 | 24.6 ± 5.3 | Yes | Coarse | ros | set |
| 28.1 | Spring | Taney | MO | 13 Apr | NA | NA | 1.85 | 0 | 6 | Yes | Coarse | ros | unk |
| 29.1 | Spring | Taney | MO | 13 Apr | NA | NA | 0.5 | 0.3 | 0.2 | Yes | Coarse | ros | unk |
| 30.1 | Spring | Taney | MO | 28 Feb | 13 Apr | 26 Apr | 3.10 ± 4.04 | 0.04 ± 0.06 | 112.0 ± 86.7 | Yes | Coarse | ros | unk |
| 31.1 | Spring | Taney | MO | 13 Apr | 26 Apr | 16 May | 2.79 ± 3.96 | 0.04 ± 0.05 | 1.3 ± 0.5 | No | Fine | ros | unk |
| 32.1 | Spring | Taney | MO | 13 Apr | 26 Apr | 16 May | 3.10 ± 1.95 | 0.40 ± 0.10 | 2.3 ± 2.31 | Yes | Coarse | ros | unk |
| 33.1 | Spring | Taney | MO | 13 Apr | 26 Apr | 16 May | 4.51 ± 7.00 | 0.04 ± 0.05 | 1.0 ± 0.5 | Yes | Coarse | ros | unk |
| 34.1 | Well | Newton | MO | 25 Feb | 08 Mar | 17 Mar | 0.82 ± 0.85 | 0 | 0.9 ± 0 | No | Fine | ros | set |
| 35.1 | Well | Newton | MO | 26 Feb | 08 Mar | 17 Mar | 2.48 ± 2.71 | 0 | 0.2 ± 0 | No | Fine | ros | set |
| 36.1 | Well | Newton | MO | 26 Feb | 10 Mar | 17 Mar | 3.26 ± 3.56 | 0 | 0.2 ± 0 | Yes | Fine | ros | set |
| 37.1 | Well | Newton | MO | 26 Feb | 08 Mar | 16 Mar | 0.36 ± 0.22 | 0 | 1.2 ± 0 | No | Fine | ros | set |
| 38.1 | Well | Lawrence | MO | 14 May | 18 May | 20 May | 2.63 ± 1.51 | 0.22 ± 0.17 | 2.2 ± 0 | No | Coarse | ros | set |
| 39.1 | Well | Newton | MO | 25 Feb | 08 Mar | 17 Mar | 4.39 ± 3.68 | 0.08 ± 0.03 | 1.0 ± 0 | No | Coarse | ros | set |
| 40.1 | Well | Newton | MO | 14 May | 18 May | 20 May | 7.16 ± 6.12 | 0 | 0.2 ± 0.1 | No | Fine | ros | set |

**Supplementary Table 2.** Results of the environmental DNA (eDNA) and visual surveys (Vis) for each sampling unit (SU). Yes indicates that the species was detected, no indicates that the species was not detected, and NA indicates that a survey was not completed for that sampling unit. A dash indicates water samples were collected, but we did not complete the DNA analysis.

| SU | Vis_1 | Vis_2 | Vis_3 | Vis_4 | eDNA_1 | eDNA_2 | eDNA_3 | eDNA_4 | eDNA_5 | Species |
| --- | --- | --- | --- | --- | --- | --- | --- | --- | --- | --- |
| 1.1 | No | No | No | NA | - | - | - | NA | NA | *Cambarus setosus* |
| 1.2 | No | No | No | NA | - | - | - | NA | NA | *Cambarus setosus* |
| 2.1 | No | No | No | NA | - | - | - | NA | NA | *Cambarus setosus* |
| 3.1 | Yes | Yes | No | No | - | - | - | - | NA | *Cambarus setosus* |
| 3.2 | Yes | Yes | Yes | Yes | - | - | - | - | NA | *Cambarus setosus* |
| 3.3 | Yes | No | Yes | No | - | - | - | - | NA | *Cambarus setosus* |
| 3.4 | No | No | NA | No | - | - | NA | - | NA | *Cambarus setosus* |
| 3.5 | No | Yes | Yes | Yes | - | - | - | - | NA | *Cambarus setosus* |
| 4.1 | No | No | No | NA | Yes | Yes | No | NA | NA | *Cambarus tartarus* |
| 4.2 | No | No | No | NA | Yes | Yes | Yes | NA | NA | *Cambarus tartarus* |
| 4.3 | No | No | No | NA | No | No | Yes | NA | NA | *Cambarus tartarus* |
| 4.4 | NA | No | No | NA | NA | Yes | Yes | NA | NA | *Cambarus tartarus* |
| 5.1 | No | No | No | NA | No | Yes | No | NA | NA | *Cambarus aculabrum* |
| 5.2 | No | No | No | NA | No | No | Yes | NA | NA | *Cambarus aculabrum* |
| 5.3 | No | No | No | NA | No | No | No | NA | NA | *Cambarus aculabrum* |
| 6.1 | No | Yes | Yes | NA | No | No | No | NA | NA | *Cambarus aculabrum* |
| 6.2 | Yes | Yes | Yes | NA | No | Yes | Yes | NA | NA | *Cambarus aculabrum* |
| 7.1 | No | No | No | Yes | - | - | - | - | NA | *Cambarus setosus* |
| 8.1 | Yes | Yes | Yes | NA | - | - | - | NA | NA | *Cambarus setosus* |
| 9.1 | No | No | No | NA | - | - | - | NA | NA | Unknown |
| 9.2 | No | No | No | NA | - | - | - | NA | NA | Unknown |
| 9.3 | No | No | No | NA | - | - | - | NA | NA | Unknown |
| 10.1 | Yes | Yes | No | NA | No | No | No | No | No | *Orconectes stygocaneyi* |
| 11.1 | No | No | No | NA | - | - | - | NA | NA | *Cambarus setosus* |
| 11.2 | No | No | No | NA | - | - | - | NA | NA | *Cambarus setosus* |
| 12.1 | No | No | No | NA | - | - | - | NA | NA | *Cambarus setosus* |
| 13.1 | No | No | No | NA | - | - | - | NA | NA | Unknown |
| 14.1 | No | No | No | NA | - | - | - | NA | NA | Unknown |
| 14.2 | No | No | No | NA | - | - | - | NA | NA | Unknown |
| 14.3 | No | No | No | NA | - | - | - | NA | NA | Unknown |
| 15.1 | No | No | No | NA | - | - | - | NA | NA | Unknown |
| 15.2 | No | No | No | NA | - | - | - | NA | NA | Unknown |
| 15.3 | No | No | No | NA | - | - | - | NA | NA | Unknown |
| 16.1 | No | No | No | NA | - | - | - | NA | NA | Unknown |
| 16.2 | No | No | No | NA | - | - | - | NA | NA | Unknown |
| 16.3 | No | No | No | NA | - | - | - | NA | NA | Unknown |
| 17.1 | Yes | Yes | Yes | NA | No | No | No | NA | NA | *Cambarus subterraneus* |
| 17.2 | No | No | No | NA | No | No | No | NA | NA | *Cambarus subterraneus* |
| 18.1 | No | NA | NA | NA | No | Yes | No | NA | NA | *Cambarus tartarus* |
| 19.1 | No | No | Yes | NA | Yes | Yes | Yes | NA | NA | *Cambarus tartarus* |
| 20.1 | No | No | No | NA | No | Yes | No | NA | NA | *Orconectes stygocaneyi* |
| 21.1 | No | NA | NA | NA | No | NA | NA | NA | NA | *Orconectes stygocaneyi* |
| 22.1 | No | No | No | NA | No | No | No | NA | NA | *Orconectes stygocaneyi* |
| 23.1 | No | No | No | NA | - | - | - | NA | NA | *Cambarus setosus* |
| 24.1 | No | Yes | No | NA | - | - | - | NA | NA | *Cambarus setosus* |
| 25.1 | Yes | Yes | Yes | NA | - | - | - | NA | NA | *Cambarus setosus* |
| 26.1 | No | No | No | NA | - | - | - | NA | NA | *Cambarus setosus* |
| 27.1 | No | No | No | NA | - | - | - | NA | NA | *Cambarus setosus* |
| 28.1 | No | NA | NA | NA | - | NA | NA | NA | NA | Unknown |
| 29.1 | No | NA | NA | NA | - | NA | NA | NA | NA | Unknown |
| 30.1 | No | No | No | NA | - | - | - | NA | NA | Unknown |
| 31.1 | No | No | No | NA | - | - | - | NA | NA | Unknown |
| 32.1 | No | No | No | NA | - | - | - | NA | NA | Unknown |
| 33.1 | No | No | No | NA | - | - | - | NA | NA | Unknown |
| 34.1 | No | No | No | NA | - | - | - | NA | NA | *Cambarus setosus* |
| 35.1 | No | No | No | NA | - | - | - | NA | NA | *Cambarus setosus* |
| 36.1 | Yes | Yes | Yes | NA | - | - | - | NA | NA | *Cambarus setosus* |
| 37.1 | Yes | Yes | Yes | NA | - | - | - | NA | NA | *Cambarus setosus* |
| 38.1 | Yes | Yes | Yes | NA | - | - | - | NA | NA | *Cambarus setosus* |
| 39.1 | Yes | Yes | Yes | NA | - | - | - | NA | NA | *Cambarus setosus* |
| 40.1 | No | No | No | NA | - | - | - | NA | NA | *Cambarus setosus* |
| 1.1 | Yes | Yes | Yes | NA | Yes | Yes | Yes | NA | NA | *Troglichthys rosae* |
| 1.2 | Yes | Yes | Yes | NA | Yes | Yes | No | NA | NA | *Troglichthys rosae* |
| 2.1 | No | No | No | NA | No | No | No | NA | NA | *Troglichthys rosae* |
| 3.1 | No | No | No | No | Yes | Yes | No | No | NA | *Troglichthys rosae* |
| 3.2 | No | No | No | No | No | No | No | No | NA | *Troglichthys rosae* |
| 3.3 | No | No | No | No | Yes | No | No | No | NA | *Troglichthys rosae* |
| 3.4 | No | No | NA | No | Yes | Yes | NA | No | NA | *Troglichthys rosae* |
| 3.5 | No | No | No | No | No | No | No | Yes | NA | *Troglichthys rosae* |
| 4.1 | No | No | No | NA | No | No | No | NA | NA | *Troglichthys rosae* |
| 4.2 | No | No | No | NA | No | Yes | No | NA | NA | *Troglichthys rosae* |
| 4.3 | No | No | No | NA | No | No | No | NA | NA | *Troglichthys rosae* |
| 4.4 | NA | No | No | NA | NA | No | No | NA | NA | *Troglichthys rosae* |
| 5.1 | Yes | No | Yes | NA | Yes | Yes | Yes | NA | NA | *Troglichthys rosae* |
| 5.2 | No | Yes | No | NA | Yes | Yes | Yes | NA | NA | *Troglichthys rosae* |
| 5.3 | No | No | No | NA | Yes | Yes | Yes | NA | NA | *Troglichthys rosae* |
| 6.1 | No | No | No | NA | Yes | Yes | Yes | NA | NA | *Troglichthys rosae* |
| 6.2 | No | No | No | NA | No | No | Yes | NA | NA | *Troglichthys rosae* |
| 7.1 | No | No | No | No | No | Yes | Yes | Yes | NA | *Troglichthys rosae* |
| 8.1 | No | No | No | NA | No | No | No | NA | NA | *Troglichthys rosae* |
| 9.1 | No | No | No | NA | No | No | No | NA | NA | *Troglichthys rosae* |
| 9.2 | No | No | No | NA | No | No | No | NA | NA | *Troglichthys rosae* |
| 9.3 | No | No | No | NA | No | No | No | NA | NA | *Troglichthys rosae* |
| 10.1 | No | No | No | NA | Yes | Yes | Yes | Yes | Yes | *Troglichthys rosae* |
| 11.1 | No | No | No | NA | No | No | No | NA | NA | *Troglichthys rosae* |
| 11.2 | No | No | No | NA | Yes | No | No | NA | NA | *Troglichthys rosae* |
| 12.1 | No | No | No | NA | No | No | No | NA | NA | *Troglichthys rosae* |
| 13.1 | No | No | No | NA | Yes | Yes | No | NA | NA | *Troglichthys rosae* |
| 14.1 | No | No | No | NA | No | No | No | NA | NA | *Troglichthys rosae* |
| 14.2 | No | No | No | NA | No | No | No | NA | NA | *Troglichthys rosae* |
| 14.3 | No | No | No | NA | No | No | No | NA | NA | *Troglichthys rosae* |
| 15.1 | No | No | No | NA | No | No | No | NA | NA | *Typhlichthys eigenmanni* |
| 15.2 | Yes | No | No | NA | No | No | No | NA | NA | *Typhlichthys eigenmanni* |
| 15.3 | No | No | Yes | NA | No | No | No | NA | NA | *Typhlichthys eigenmanni* |
| 16.1 | No | No | No | NA | No | No | No | NA | NA | *Typhlichthys eigenmanni* |
| 16.2 | Yes | Yes | No | NA | No | Yes | No | NA | NA | *Typhlichthys eigenmanni* |
| 16.3 | Yes | Yes | Yes | NA | Yes | Yes | Yes | NA | NA | *Typhlichthys eigenmanni* |
| 17.1 | Yes | Yes | No | NA | Yes | No | Yes | NA | NA | *Troglichthys rosae* |
| 17.2 | No | No | No | NA | Yes | Yes | Yes | NA | NA | *Troglichthys rosae* |
| 18.1 | Yes | NA | NA | NA | Yes | Yes | No | NA | NA | *Troglichthys rosae* |
| 19.1 | No | No | Yes | NA | Yes | No | Yes | NA | NA | *Troglichthys rosae* |
| 20.1 | No | No | No | NA | Yes | Yes | Yes | NA | NA | *Troglichthys rosae* |
| 21.1 | No | NA | NA | NA | Yes | NA | NA | NA | NA | *Troglichthys rosae* |
| 22.1 | No | No | No | NA | No | No | No | NA | NA | *Troglichthys rosae* |
| 23.1 | No | No | No | NA | Yes | No | Yes | NA | NA | *Troglichthys rosae* |
| 24.1 | No | No | No | NA | No | No | No | NA | NA | *Troglichthys rosae* |
| 25.1 | No | No | No | NA | No | No | No | NA | NA | *Troglichthys rosae* |
| 26.1 | No | No | No | NA | Yes | Yes | Yes | NA | NA | *Troglichthys rosae* |
| 27.1 | No | No | No | NA | Yes | Yes | No | NA | NA | *Troglichthys rosae* |
| 28.1 | No | NA | NA | NA | No | NA | NA | NA | NA | *Troglichthys rosae* |
| 29.1 | No | NA | NA | NA | No | NA | NA | NA | NA | *Troglichthys rosae* |
| 31.1 | No | No | No | NA | No | No | No | NA | NA | *Troglichthys rosae* |
| 32.1 | No | No | No | NA | No | No | No | NA | NA | *Troglichthys rosae* |
| 33.1 | No | No | No | NA | No | No | No | NA | NA | *Troglichthys rosae* |
| 30.1 | No | No | No | NA | No | Yes | Yes | NA | NA | *Troglichthys rosae* |
| 34.1 | No | No | No | NA | Yes | No | Yes | NA | NA | *Troglichthys rosae* |
| 35.1 | No | Yes | Yes | NA | Yes | Yes | Yes | NA | NA | *Troglichthys rosae* |
| 36.1 | No | No | No | NA | Yes | No | No | NA | NA | *Troglichthys rosae* |
| 37.1 | Yes | No | Yes | NA | Yes | Yes | Yes | NA | NA | *Troglichthys rosae* |
| 38.1 | No | No | No | NA | No | No | No | NA | NA | *Troglichthys rosae* |
| 39.1 | No | Yes | No | NA | Yes | No | Yes | NA | NA | *Troglichthys rosae* |
| 40.1 | No | No | No | NA | No | No | No | NA | NA | *Troglichthys rosae* |

**Supplementary Table 3.** DNA sequences were obtained for each of our study species from various sources to design species-specific Taqman® assays. The number of sequences derived from each source are listed in parentheses. The accession number can be used to locate the sequence on GenBank. MDC = Missouri Department of Conservation, USFWS = United States Fish and Wildlife Service

| Species | Sources | Accession Numbers |
| --- | --- | --- |
| *Cambarus aculabrum* | GenBank (1) | JX514482 |
| *Cambarus setosus* | This study (6), MDC (1), GenBank (1) | MN984898, MN984899, MN984900, MT012507, MT012508, MT012503, MN984897, JX514464 |
| *Cambarus subterraneus* | USFWS (6) | MN984901, MN984902, MN984903, MN984904, MN984905, MN984906 |
| *Cambarus tartarus* | USFWS (7), GenBank (1) | MN984907, MN984908, MN984909, MN984910, MN984911, MN984912, MN984913, JX514465 |
| *Orconectes stygocaneyi* | MDC (1), This study (3) | MT012505, MN984915, MT012506, MT012509 |
| *Troglichthys rosae* | USFWS (10), GenBank (13) | MN966827, MN966828, MN966829, MN966830, MN966831, MT013124, MT013125, MT013126, MT013127, MT013128, HQ707763, HQ707762, HQ707761, HQ707760, MK012085, HQ338387, HQ338386, HQ338385, HQ338384, HQ338383, HQ338382, HQ338381, HQ338380 |
| *Typlichthys eigenmanni* | GenBank (2) | JN592335, JN592328 |
